# Supplementary material for: PM2.5 composition and disease aggravation in amyotrophic lateral sclerosis: An analysis of long-term exposure to components of fine particulate matter in New York State
Source: PubMed Central journal article supplement — Environ Epidemiol. 2022 Mar 30;6(2):e204. doi: 10.1097/EE9.0000000000000204 (PMC9005248; doi:10.1097/ee9.0000000000000204), 2022-03-30
Supplement: ee9-6-e204-s001.pdf [file ee9-6-e204-s001.pdf]

## Supplemental Material

### **PM<sub>2.5</sub> composition and disease aggravation in amyotrophic lateral sclerosis: an analysis of long-term exposure to components of fine particulate matter in New York State**

Yanelli Nunez, Amelia K. Boehme, Jeff Goldsmith, Maggie Li, Aaron van Donkelaar, Marc G. Weisskopf, Diane B. Re, Randall V. Martin, and Marianthi-Anna Kioumourtzoglou

### **List of Figures**

|     |                                                                   |          |
|-----|-------------------------------------------------------------------|----------|
| S.1 | <b>Time trends in hospitalization counts . . . . .</b>            | <b>2</b> |
| S.2 | <b>Sensitivity analysis: confounding by time trends . . . . .</b> | <b>3</b> |
| S.3 | <b>Sensitivity analysis: age stratified analysis . . . . .</b>    | <b>4</b> |

## Amyotrophic Lateral Sclerosis

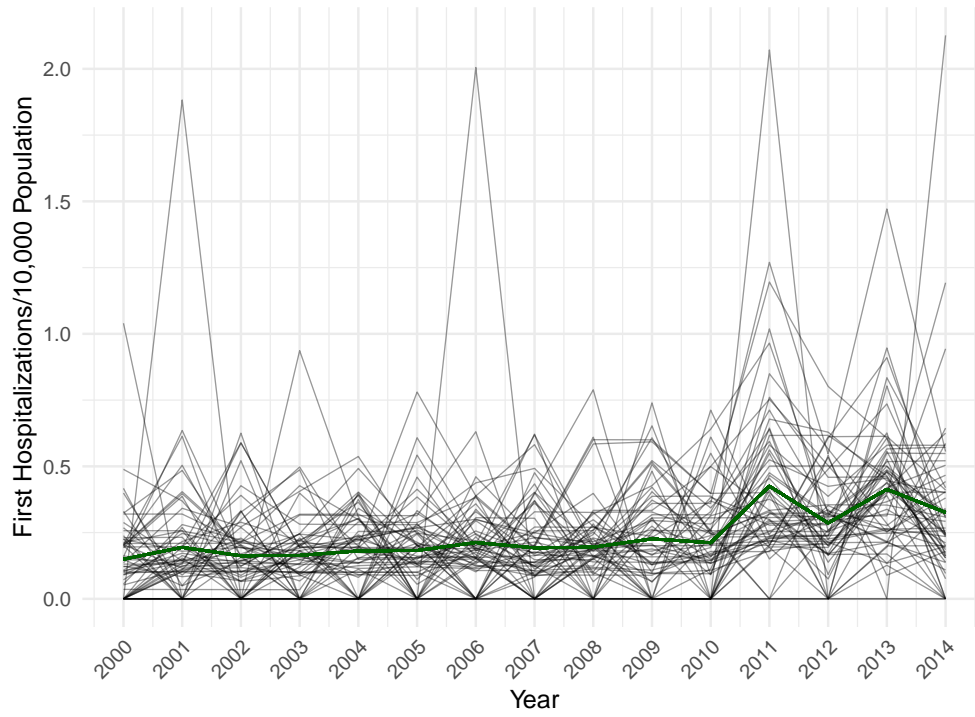

**Figure S.1: Time trends in hospitalization counts.** The spaghetti plot show the hospitalization counts per 10,000 population per county (gray lines) and the NYS average (dark green line) from 2000 to 2014.

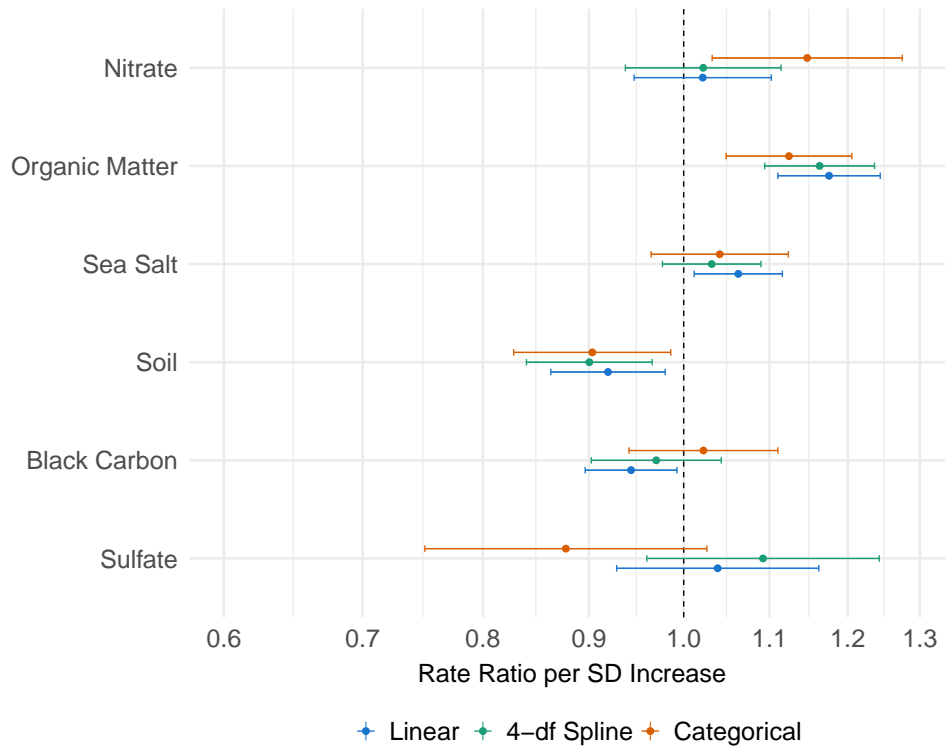

**Figure S.2: Sensitivity analysis: confounding by time trends.** Linear associations between one-year exposure to each  $PM_{2.5}$  component and first ALS hospitalization in New York State (2000–2014) using three different parameterizations of the variable “year”: 1) as a linear term (Linear); 2) with a natural spline with 4 degrees of freedom (4-df Spline); and 3) as a categorical variable (Categorical). All models were adjusted for potential SES confounders. The effect estimates correspond to the rate ratios of first ALS hospitalization per one standard deviation increase in annual  $PM_{2.5}$  component concentrations. Bars represent 95% confidence intervals.

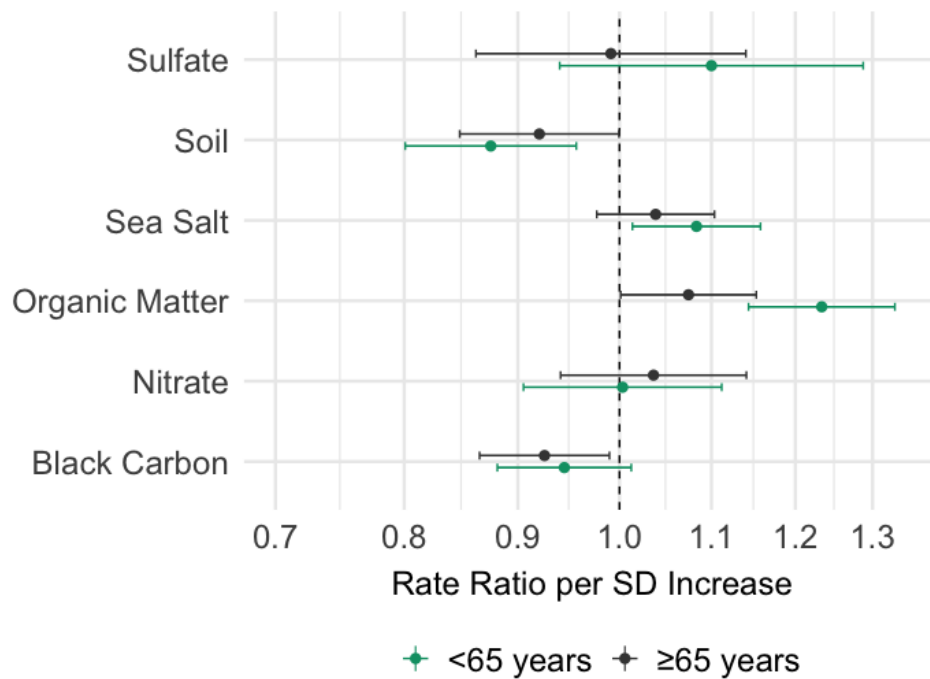

**Figure S.3: Sensitivity analysis: age stratified analysis.** Linear associations between one-year exposure to each PM<sub>2.5</sub> component and first ALS hospitalization in New York State (2000–2014) by age ( $\geq 65$  dark gray and  $< 65$  green). Both models were adjusted for potential SES confounders and included all PM<sub>2.5</sub> components. The effect estimates correspond to the rate ratios of first ALS hospitalization per one standard deviation increase in annual PM<sub>2.5</sub> component concentrations. Bars represent 95% confidence intervals.
